# Supplementary material for: Short-term exposure to sulphur dioxide (SO2) and all-cause and respiratory mortality: A systematic review and meta-analysis
Source: PubMed Central journal article supplement — Environ Int. 2021 May;150:106434. doi: 10.1016/j.envint.2021.106434 (PMC7937788; doi:10.1016/j.envint.2021.106434), 2021-05
Supplement: mmc1.pdf [file mmc1.pdf]

***Appendix A***  
***Supplementary data 1***

---

**Online Supplement**

**Short-term exposure to sulphur dioxide (SO<sub>2</sub>) and all-cause and respiratory  
mortality: a systematic review and meta-analysis**

Pablo Orellano<sup>1\*</sup>, Julieta Reynoso<sup>2</sup>, Nancy Quaranta<sup>3</sup>

<sup>1</sup> Centro de Investigaciones y Transferencia San Nicolás, Universidad Tecnológica Nacional (CONICET), San Nicolás, Argentina.

<sup>2</sup> Hospital General “San Felipe”, San Nicolás, Argentina.

<sup>3</sup> Facultad Regional San Nicolás, Universidad Tecnológica Nacional, San Nicolás, Argentina; Comisión de Investigaciones Científicas de la Provincia de Buenos Aires, La Plata, Argentina.

\*Corresponding Author

**Corresponding author:** Pablo Orellano. Colon 332. San Nicolas, Provincia de Buenos Aires, Argentina (ZIP 2900). Phone: +54 336 4420830. E-mail address:

[porellano@frsn.utn.edu.ar](mailto:porellano@frsn.utn.edu.ar)

***Appendix A***  
***Supplementary data 1***

---

**Index**

|                                                                                      |         |
|--------------------------------------------------------------------------------------|---------|
| Table A.1. PRISMA checklist .....                                                    | Page 3  |
| Table A.2. Search strategy for MEDLINE via PubMed .....                              | Page 6  |
| Table A.3. Criteria for the risk of bias (RoB) assessment .....                      | Page 7  |
| Figure A.1. Summary of the risk of bias (RoB) assessment .....                       | Page 10 |
| Table A.4. Subgroup analysis by age, sex, and continent .....                        | Page 11 |
| Table A.5. Sensitivity analysis by lag .....                                         | Page 12 |
| Table A.6. Sensitivity analysis by study design .....                                | Page 13 |
| Table A.7. Sensitivity analysis comparing multicity versus single-city studies ..... | Page 14 |
| Table A.8. Sensitivity analysis by risk of bias (RoB) in individual studies .....    | Page 15 |
| Table A.9. Unbiased relative risks and E-value .....                                 | Page 16 |
| Figure A.2. Funnel plots to explore publication bias .....                           | Page 17 |
| Table A.10. Co-pollutant analysis .....                                              | Page 18 |

**Appendix A**  
**Supplementary data 1**

**Table A.1. PRISMA checklist.**

| #                   | Item                      | Guidance                                                                                                                                                                                                                                                                                                                                                                                                                                          | On page #                      |
|---------------------|---------------------------|---------------------------------------------------------------------------------------------------------------------------------------------------------------------------------------------------------------------------------------------------------------------------------------------------------------------------------------------------------------------------------------------------------------------------------------------------|--------------------------------|
| <b>Title</b>        |                           |                                                                                                                                                                                                                                                                                                                                                                                                                                                   |                                |
| 1                   | Title                     | Identify the report as a systematic review, or systematic review and meta-analysis, as appropriate.                                                                                                                                                                                                                                                                                                                                               | 1                              |
| <b>Abstract</b>     |                           |                                                                                                                                                                                                                                                                                                                                                                                                                                                   |                                |
| 2                   | Structured summary        | Provide a structured summary including, as applicable: <ul style="list-style-type: none"> <li>• Background;</li> <li>• Objectives;</li> <li>• Data sources;</li> <li>• Study eligibility criteria, participants, and interventions;</li> <li>• Study appraisal and synthesis methods;</li> <li>• Results;</li> <li>• Limitations; conclusions and implications of key findings;</li> <li>• Systematic review registration number.</li> </ul>      | 2-3                            |
| <b>Introduction</b> |                           |                                                                                                                                                                                                                                                                                                                                                                                                                                                   |                                |
| 3                   | Rationale                 | Describe the rationale for the review in the context of what is already known.                                                                                                                                                                                                                                                                                                                                                                    | 4-5                            |
| 4                   | Objectives                | Provide an explicit Population-Intervention-Comparator-Outcome-Study Design (PICOS) or Population-Exposure-Comparator-Outcome-Study Design (PECOS) statement as appropriate, detailing the following in relation to the research questions being asked: <ul style="list-style-type: none"> <li>• Participants</li> <li>• Interventions / Exposures (as appropriate)</li> <li>• Comparisons</li> <li>• Outcomes</li> <li>• Study design</li> </ul> | 5-6                            |
| <b>Methods</b>      |                           |                                                                                                                                                                                                                                                                                                                                                                                                                                                   |                                |
| 5                   | Protocol and registration | Indicate if a review protocol exists, if and where it can be accessed (e.g. web address), and registration information including registration number (if available).                                                                                                                                                                                                                                                                              | 1, 5, and Supplementary data 2 |
| 6                   | Eligibility criteria      | Specify study characteristics (e.g. PICOS/PECOS, length of exposure) and report characteristics (e.g. years considered, language, publication status) used as criteria for eligibility, giving rationale.                                                                                                                                                                                                                                         | 6-7, and Table 1               |
| 7                   | Information sources       | Describe all information sources (e.g. databases with dates of coverage, contact with study authors to identify additional studies) in the search, and date last searched.                                                                                                                                                                                                                                                                        | 7-8                            |

**Appendix A**  
**Supplementary data 1**

| #              | Item                               | Guidance                                                                                                                                                                                                               | On page #                                       |
|----------------|------------------------------------|------------------------------------------------------------------------------------------------------------------------------------------------------------------------------------------------------------------------|-------------------------------------------------|
| 8              | Search                             | Present full electronic search strategy for at least one database, including any limits used, such that it could be repeated.                                                                                          | Table A.2 (Supplementary data 1)                |
| 9              | Study selection                    | State the process for selecting studies (i.e., screening, eligibility, included in systematic review, and, if applicable, included in the meta-analysis).                                                              | 7-8                                             |
| 10             | Data collection process            | Describe method of data extraction from reports (e.g., piloted forms, independently, in duplicate) and any processes for obtaining and confirming data from investigators.                                             | 8                                               |
| 11             | Data items                         | List and define all variables for which data were sought (e.g., PICOS/PECOS, funding sources) and any assumptions and simplifications made.                                                                            | 8                                               |
| 12             | Risk of bias in individual studies | Describe methods used for assessing risk of bias of individual studies (including specification of whether this was done at the study or outcome level), and how this information is to be used in any data synthesis. | 9-10, and Table A.3 (Supplementary data 1)      |
| 13             | Summary measures                   | State the principal summary measures (e.g., risk ratio, difference in means).                                                                                                                                          | 10-11                                           |
| 14             | Synthesis of results               | Describe the methods of handling data and combining results of studies, if done, including measures of consistency (e.g., I <sup>2</sup> ) for each meta-analysis.                                                     | 10-13                                           |
| 15             | Risk of bias across studies        | Specify any assessment of risk of bias that may affect the cumulative evidence (e.g., publication bias, selective reporting within studies).                                                                           | 13-16, and Supplementary data 3                 |
| 16             | Additional analyses                | Describe methods of additional analyses (e.g., sensitivity or subgroup analyses, meta-regression), if done, indicating which were pre-specified.                                                                       | 11-12                                           |
| <b>Results</b> |                                    |                                                                                                                                                                                                                        |                                                 |
| 17             | Study selection                    | Give numbers of studies screened, assessed for eligibility, and included in the review, with reasons for exclusions at each stage, illustrated with a PRISMA flow diagram.                                             | 16-18, Figure 1, and Supplementary data 4       |
| 18             | Study characteristics              | For each study, present in a summary table the characteristics for which data were extracted (e.g., study size, PICOS/PECOS, follow-up period) and provide the citations.                                              | Supplementary data 5                            |
| 19             | Risk of bias within studies        | Present data on risk of bias of each study and, if available, any outcome level assessment (see item 12).                                                                                                              | 19, Figure A.1 (Supp. data 1), and Supp. Data 6 |

**Appendix A**  
**Supplementary data 1**

| #                 | Item                          | Guidance                                                                                                                                                                                                                                         | On page #                                     |
|-------------------|-------------------------------|--------------------------------------------------------------------------------------------------------------------------------------------------------------------------------------------------------------------------------------------------|-----------------------------------------------|
| 20                | Results of individual studies | For all outcomes considered (benefits or harms), present, for each study: (a) simple summary data for each intervention group (b) effect estimates and confidence intervals, ideally with a forest plot (unless such a plot would be misleading) | Supplementary data 5, and Figures 2 to 5      |
| 21                | Synthesis of results          | Present results of each meta-analysis done, including confidence intervals and measures of consistency.                                                                                                                                          | 19-21, and Table 2                            |
| 22                | Risk of bias across studies   | Present results of any assessment of risk of bias across studies (see Item 15).                                                                                                                                                                  | 23-24, Figure A.2 (Supp. data 1), and Table 2 |
| 23                | Additional analysis           | Give results of additional analyses, if done (e.g., sensitivity or subgroup analyses, meta-regression [see Item 16]).                                                                                                                            | 21-24, and Tables A.4 to A.10 (Supp. Data 1)  |
| <b>Discussion</b> |                               |                                                                                                                                                                                                                                                  |                                               |
| 24                | Summary of evidence           | Summarize the main findings including the strength of evidence for each main outcome; consider their relevance to key groups (e.g., researchers, users, and policy makers).                                                                      | 27-32                                         |
| 25                | Limitations                   | Discuss limitations at study and outcome level (e.g., risk of bias), and at review-level (e.g., incomplete retrieval of identified research, reporting bias).                                                                                    | 32-33                                         |
| 26                | Conclusions                   | Provide a general interpretation of the results in the context of other evidence, and implications for future research.                                                                                                                          | 33-34                                         |
| <b>Funding</b>    |                               |                                                                                                                                                                                                                                                  |                                               |
| 27                | Funding                       | Describe sources of funding for the systematic review and other support (e.g., supply of data); role of funders for the systematic review.                                                                                                       | 34-35                                         |

*Environment International* modified PRISMA report adapted from: Moher D, Liberati A, Tetzlaff J, Altman DG, The PRISMA Group (2009). Preferred Reporting Items for Systematic Reviews and Meta-Analyses: The PRISMA Statement. *PLoS Med* 6(7): e1000097. doi:10.1371/journal.pmed1000097. (Changes are minor, with text edits to accommodate the subject matter of the journal and formatting to fit page.)

**Appendix A**  
**Supplementary data 1**

**Table A.2. Search strategy for MEDLINE via PubMed.**

| <b>Search timeline:</b> 01.Jan.1980 – 31.Dec.2018 <sup>1</sup>                                                                                                                                                                                                                  | <b>Abstracts</b> |
|---------------------------------------------------------------------------------------------------------------------------------------------------------------------------------------------------------------------------------------------------------------------------------|------------------|
| #4 Search: (#1 AND #2 AND #3) AND (("1980/01/01"[Date - Publication] : "2018/12/06"[Date - Publication])) Sort by: Most Recent                                                                                                                                                  | 311              |
| #3 Search: ("short term"[TIAB] OR shortterm[TIAB] OR "short range"[TIAB] OR acute[TIAB] OR "acute disease"[MH]) AND (("1980/01/01"[Date - Publication] : "2018/12/06"[Date - Publication])) Sort by: Most Recent                                                                | 1,194,266        |
| #2 Search: (mortality[TIAB] OR mortalities[TIAB] OR death[TIAB] OR deaths[TIAB] OR dying[TIAB] OR fatal[TIAB] OR fatality[TIAB] OR lethal[TIAB] OR death[MH] OR mortality[MH]) AND (("1980/01/01"[Date - Publication] : "2018/12/06"[Date - Publication])) Sort by: Most Recent | 1,611,713        |
| #1 Search: (("sulfur dioxide"[TIAB] OR "sulfur oxides"[TIAB] OR SO <sub>2</sub> [TIAB] OR "sulfur dioxide"[MH] OR "sulfur oxides"[MH] OR SO <sub>x</sub> [TIAB])) AND (("1980/01/01"[Date - Publication] : "2018/12/06"[Date - Publication])) Sort by: Most Recent              | 14,106           |

<sup>1</sup> The search was updated in July 2020.

**Appendix A**  
**Supplementary data 1**

**Table A.3. Criteria for the risk of bias (RoB) assessment**

| Domain / Subdomain                                                                                                                | Criterion for low RoB                                                                                                                                                                                                                                                                                                                               | Criterion for moderate RoB                                                                                                      | Criterion for high RoB                                                         |
|-----------------------------------------------------------------------------------------------------------------------------------|-----------------------------------------------------------------------------------------------------------------------------------------------------------------------------------------------------------------------------------------------------------------------------------------------------------------------------------------------------|---------------------------------------------------------------------------------------------------------------------------------|--------------------------------------------------------------------------------|
| <b>1. Confounding</b>                                                                                                             |                                                                                                                                                                                                                                                                                                                                                     |                                                                                                                                 |                                                                                |
| Were all confounders considered adjusted for in the analysis?                                                                     | Critical and additional confounders accounted for. For ETS: Temperature, Seasonality, Day of the week, Long-term trends, Holidays (not vacations), Influenza epidemics. For CCO: Temperature, Influenza epidemics.                                                                                                                                  | Critical confounders accounted for. For ETS: Temperature, Seasonality, Day of the week, Long-term trends. For CCO: Temperature. | Less than all critical confounders accounted for, or confounders not reported. |
| Validity of measuring of confounding factors                                                                                      | The majority of critical and additional confounders are independent from the method for measuring (DoW, seasonality, long-term trends, holidays). Temperature is less subject to variations than air pollution, and does not need a particular monitoring network. Flu epidemics are in general well detected through epidemiological surveillance. | ----                                                                                                                            | ----                                                                           |
| Control in analysis (Did the authors use an appropriate analysis method or study design that controlled for confounding domains?) | Use of poisson regression with GLM or GAM, or logistic regression in CCO designs.                                                                                                                                                                                                                                                                   | ----                                                                                                                            | Other procedures, or not reported.                                             |
| <b>2. Selection bias</b>                                                                                                          |                                                                                                                                                                                                                                                                                                                                                     |                                                                                                                                 |                                                                                |
| Selection of participants into the study (includes non-response)                                                                  | As the outcome is mortality in a city (or region), it can be expected that all deaths were reported and included in the study.                                                                                                                                                                                                                      | ----                                                                                                                            | ----                                                                           |

RoB, risk of bias; ETS, ecological time-series design; CCO, case-crossover design; DoW, day-of-week; GLM, generalized linear model; GAM, generalized additive model; ICD, international classification of diseases.

**Appendix A**  
**Supplementary data 1**

**Table A.3. (continued)**

| Domain / Subdomain                                                   | Criterion for low RoB                                                                                                                                                                                                          | Criterion for moderate RoB                                                                                                      | Criterion for high RoB                                                                            |
|----------------------------------------------------------------------|--------------------------------------------------------------------------------------------------------------------------------------------------------------------------------------------------------------------------------|---------------------------------------------------------------------------------------------------------------------------------|---------------------------------------------------------------------------------------------------|
| <b>3. Exposure assessment</b>                                        |                                                                                                                                                                                                                                |                                                                                                                                 |                                                                                                   |
| Methods used for exposure assessment                                 | Measurements of air pollutants were provided by one or more monitoring stations in the city.                                                                                                                                   | Air pollution estimated through a validated prediction model, or using data from a station outside the city.                    | ---                                                                                               |
| Exposure measurement methods comparable across the range of exposure | In time-series studies of short-term exposure, the methods for exposure measure are the same between groups.                                                                                                                   | ---                                                                                                                             | ---                                                                                               |
| Exposure contrast                                                    | In time-series studies of short-term exposure, between-subject (days) variance is always supposed to be larger than the within-subject variance. This can be seen in the description tables of averages and dispersion values. | ---                                                                                                                             | ---                                                                                               |
| <b>4. Outcome measurement</b>                                        |                                                                                                                                                                                                                                |                                                                                                                                 |                                                                                                   |
| Blinding of outcome measurement                                      | Mortality is not supposed to be influenced by the knowledge of the exposure.                                                                                                                                                   | ---                                                                                                                             | ---                                                                                               |
| Validity of outcome measurements                                     | The validity is judged to be adequate in all-cause mortality.                                                                                                                                                                  | The validity is judged to be not adequate in cause-specific mortality. However, the measurement is not related to the exposure. | ---                                                                                               |
| Outcome measurement                                                  | The authors used the ICD; or the authors didn't use the ICD or other known standard, but for all-cause mortality this does not lead to bias                                                                                    | ---                                                                                                                             | The authors didn't report the use of the ICD or other known standard for cause-specific mortality |

RoB, risk of bias; ETS, ecological time-series design; CCO, case-crossover design; DoW, day-of-week; GLM, generalized linear model; GAM, generalized additive model; ICD, international classification of diseases.



**Appendix A**  
**Supplementary data 1**

**Table A.3 (continued)**

| Domain / Subdomain                                         | Criterion for low RoB                                                                                                              | Criterion for moderate RoB                                                                                                          | Criterion for high RoB                                                                             |
|------------------------------------------------------------|------------------------------------------------------------------------------------------------------------------------------------|-------------------------------------------------------------------------------------------------------------------------------------|----------------------------------------------------------------------------------------------------|
| <b>5. Missing data</b>                                     |                                                                                                                                    |                                                                                                                                     |                                                                                                    |
| Missing data of outcome measures                           | For mortality data extracted from death registries, missing data is not expected.                                                  | ---                                                                                                                                 | ----                                                                                               |
| Missing data of exposures                                  | The authors described adequate methods for imputation of missing data, or no missing data observed, or missing data lower than 5%. | ----                                                                                                                                | No data on number of missing values, imputation methods, or number of missing data higher than 5%. |
| <b>6. Selective reporting</b>                              |                                                                                                                                    |                                                                                                                                     |                                                                                                    |
| Authors reported a priori primary and secondary study aims | Paper reporting data analysis over a complete or original database.                                                                | Paper reporting a subset or re-analysis of data that were already published in a previous article, or that will be published later. | ----                                                                                               |

RoB, risk of bias; ETS, ecological time-series design; CCO, case-crossover design; DoW, day-of-week; GLM, generalized linear model; GAM, generalized additive model; ICD, international classification of diseases.

**Appendix A**  
**Supplementary data 1**

---

**Figure A.1. Summary of the risk of bias (RoB) assessment.**

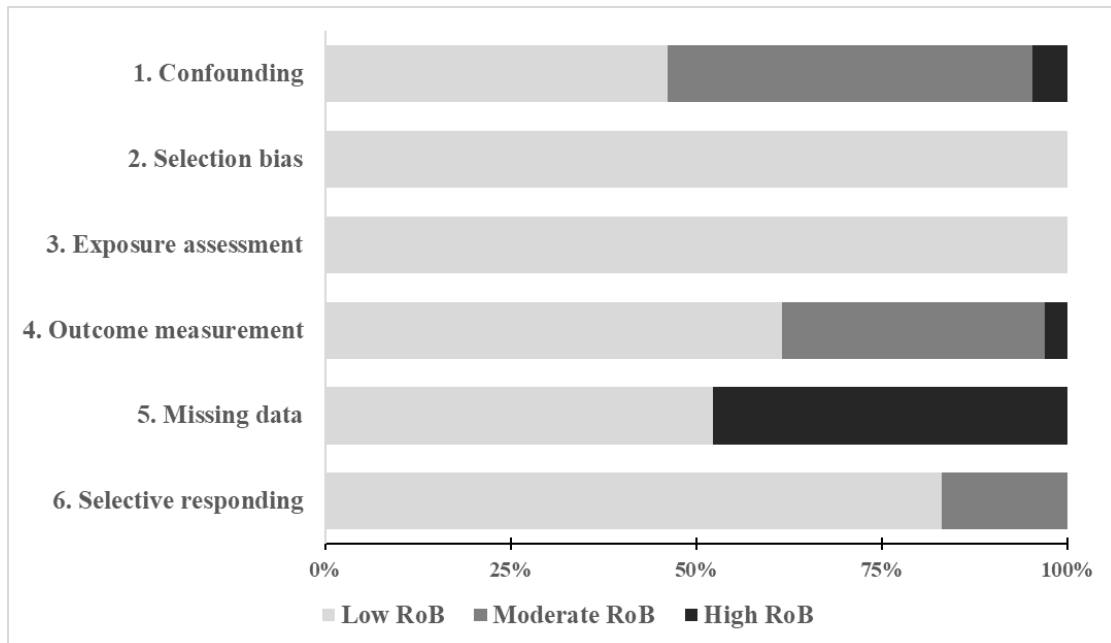

**Appendix A**  
**Supplementary data 1**

**Table A.4. Subgroup analysis by age, sex, and continent.**

| <b>Pollutant</b>                  | <b>Outcome</b>        | <b>Subgroup</b> | <b>Number of effect sizes</b> | <b>RR (95% CI)</b>                      | <b>p-value</b>  |
|-----------------------------------|-----------------------|-----------------|-------------------------------|-----------------------------------------|-----------------|
| SO <sub>2</sub> (24-hour average) | All-cause mortality   | All ages        | 36                            | <b>1.0059</b><br><b>(1.0042-1.0075)</b> | <b>&lt;0.01</b> |
|                                   |                       | Children        | 4                             | <b>1.0616</b><br><b>(1.0389-1.0849)</b> |                 |
|                                   |                       | Elderly         | 23                            | 1.0042<br>(0.9989-1.0094)               |                 |
| SO <sub>2</sub> (24-hour average) | All-cause mortality   | Male            | 5                             | 1.0060<br>(0.9958-1.0162)               | 0.36            |
|                                   |                       | Female          | 5                             | 1.0127<br>(0.9953-1.0304)               |                 |
| SO <sub>2</sub> (24-hour average) | All-cause mortality   | Europe          | 20                            | <b>1.0066</b><br><b>(1.0035-1.0098)</b> | 0.49            |
|                                   |                       | Asia            | 14                            | <b>1.0054</b><br><b>(1.0036-1.0073)</b> |                 |
| SO <sub>2</sub> (24-hour average) | Respiratory mortality | All ages        | 23                            | <b>1.0067</b><br><b>(1.0022-1.0113)</b> | 0.09            |
|                                   |                       | Elderly         | 10                            | <b>1.0153</b><br><b>(1.0050-1.0257)</b> |                 |
| SO <sub>2</sub> (24-hour average) | Respiratory mortality | Male            | 6                             | 1.0115<br>(0.9829-1.0409)               | 0.99            |
|                                   |                       | Female          | 6                             | 1.0111<br>(0.9554-1.0701)               |                 |
| SO <sub>2</sub> (24-hour average) | Respiratory mortality | Europe          | 15                            | 1.0054<br>(0.9982-1.0127)               | 0.40            |
|                                   |                       | Asia            | 8                             | <b>1.0084</b><br><b>(1.0054-1.0114)</b> |                 |
| SO <sub>2</sub> (1-hour max.)     | All-cause mortality   | All ages        | 4                             | 1.0016<br>(0.9930-1.0102)               | 0.74            |
|                                   |                       | Elderly         | 6                             | 1.0005<br>(0.9953-1.0056)               |                 |

RR, pooled relative risks; 95% CI, 95% confidence interval; p-value, significance of the test for the difference between subgroups (interaction); statistically significant results in bold.

**Appendix A**  
**Supplementary data 1**

**Table A.5. Sensitivity analysis by lag<sup>1</sup>.**

| <b>Pollutant</b>                  | <b>Outcome</b>        | <b>Number of effect sizes</b> | <b>RR (95% CI)</b>                      | <b>p-value</b>    | <b>PI</b>            |
|-----------------------------------|-----------------------|-------------------------------|-----------------------------------------|-------------------|----------------------|
| SO <sub>2</sub> (24-hour average) | All-cause mortality   | 25                            | <b>1.0070</b><br><b>(1.0053-1.0088)</b> | <b>&lt;0.0001</b> | <b>1.0026-1.0114</b> |
| SO <sub>2</sub> (24-hour average) | Respiratory mortality | 14                            | <b>1.0070</b><br><b>(1.0006-1.0135)</b> | <b>0.0345</b>     | 0.9961-1.0180        |
| SO <sub>2</sub> (1-hour max.)     | All-cause mortality   | 4                             | 1.0016<br>(0.9985-1.0046)               | 0.3137            | 0.9967-1.0064        |

RR, pooled relative risks; 95% CI, 95% confidence interval; p-value, significance of the association; PI, 80% prediction interval; statistically significant results in bold.

<sup>1</sup> Considering only lags 0-1, 0, and 1 days.

**Appendix A**  
**Supplementary data 1**

**Table A.6. Sensitivity analysis by study design.**

| <b>Pollutant</b>                  | <b>Outcome</b>        | <b>Study design</b> | <b>Number of effect sizes</b> | <b>RR<br/>(95% CI)</b>                  | <b>p-value</b>    |
|-----------------------------------|-----------------------|---------------------|-------------------------------|-----------------------------------------|-------------------|
| SO <sub>2</sub> (24-hour average) | All-cause mortality   | ETS                 | 29                            | <b>1.0063</b><br><b>(1.0049-1.0078)</b> | <b>&lt;0.0001</b> |
|                                   |                       | CCO                 | 7                             | <b>1.0033</b><br><b>(1.0025-1.0042)</b> | <b>&lt;0.0001</b> |
| SO <sub>2</sub> (24-hour average) | Respiratory mortality | ETS                 | 18                            | <b>1.0063</b><br><b>(1.0007-1.0120)</b> | <b>0.0308</b>     |
|                                   |                       | CCO                 | 5                             | <b>1.0059</b><br><b>(1.0008-1.0110)</b> | <b>0.0323</b>     |
| SO <sub>2</sub> (1-hour max)      | All-cause mortality   | ETS                 | 3                             | 1.0015<br>(0.9902-1.0129)               | 0.6283            |
| SO <sub>2</sub> (1-hour max)      | Respiratory mortality | ETS                 | 3                             | <b>1.0052</b><br><b>(1.0013-1.0091)</b> | <b>0.0287</b>     |

RR, pooled relative risks; 95% CI, 95% confidence interval; p-value, significance of the association; ETS, ecological time series design; CCO, case-crossover design; statistically significant results in bold.

**Appendix A**  
*Supplementary data 1*

**Table A.7. Sensitivity analysis comparing multicity versus single-city studies.**

| Pollutant                         | Outcome               | Type of study | Number of effect sizes | RR (95% CI)                             | p-value |
|-----------------------------------|-----------------------|---------------|------------------------|-----------------------------------------|---------|
| SO <sub>2</sub> (24-hour average) | All-cause mortality   | Multicity     | 11                     | <b>1.0047</b><br><b>(1.0031-1.0063)</b> | 0.25    |
|                                   |                       | Single-city   | 25                     | <b>1.0067</b><br><b>(1.0034-1.0101)</b> |         |
| SO <sub>2</sub> (24-hour average) | Respiratory mortality | Multicity     | 10                     | <b>1.0067</b><br><b>(1.0023-1.0112)</b> | 0.72    |
|                                   |                       | Single-city   | 13                     | 1.0044<br>(0.9912-1.0178)               |         |

RR, pooled relative risks; 95% CI, 95% confidence interval; P-value, significance of the test for the difference between subgroups (interaction); statistically significant results in bold.

**Appendix A**  
**Supplementary data 1**

**Table A.8. Sensitivity analysis by risk of bias (RoB) in individual studies.**

| <b>Pollutant</b>                  | <b>Outcome</b>        | <b>RoB domain</b> | <b>Number of effect sizes</b> | <b>RoB value</b> | <b>RR (95% CI)</b>                      | <b>p-value</b> |
|-----------------------------------|-----------------------|-------------------|-------------------------------|------------------|-----------------------------------------|----------------|
| SO <sub>2</sub> (24-hour average) | All-cause mortality   | Missing           | 19                            | Low - moderate   | <b>1.0048</b><br><b>(1.0023-1.0073)</b> | 0.21           |
|                                   |                       |                   | 17                            | High             | <b>1.0067</b><br><b>(1.0047-1.0088)</b> |                |
| SO <sub>2</sub> (24-hour average) | All-cause mortality   | Confounding       | 33                            | Low - moderate   | <b>1.0053</b><br><b>(1.0038-1.0068)</b> | 0.06           |
|                                   |                       |                   | 3                             | High             | 1.0105<br>(0.9993-1.0219)               |                |
| SO <sub>2</sub> (24-hour average) | Respiratory mortality | Missing           | 11                            | Low - moderate   | <b>1.0094</b><br><b>(1.0039-1.0149)</b> | 0.23           |
|                                   |                       |                   | 12                            | High             | 1.0050<br>(0.9989-1.0111)               |                |

RR, pooled relative risks; 95% CI, 95% confidence interval; p-value, significance of the test for the difference between subgroups (interaction); statistically significant results in bold.

**Appendix A**  
**Supplementary data 1**

**Table A.9. Unbiased relative risks and E-value.**

| <b>Pollutant</b>                  | <b>Outcome</b>        | <b>E-value<br/>(95% CI)</b> | <b>RR<sub>U</sub><sup>1</sup><br/>(Song et al., 2017)</b> |
|-----------------------------------|-----------------------|-----------------------------|-----------------------------------------------------------|
| SO <sub>2</sub> (24-hour average) | All-cause mortality   | 1.2052<br>(1.1773-1.2292)   | 1.100                                                     |
| SO <sub>2</sub> (24-hour average) | Respiratory mortality | 1.2213<br>(1.1253-1.2982)   | 1.210                                                     |
| SO <sub>2</sub> (1-hour max)      | Respiratory mortality | 1.1905<br>(1.0875-1.2665)   | 1.210                                                     |

E-Value, a value that quantifies, for a single study, the minimum confounding bias capable of reducing the true effect to a chosen threshold; 95% CI, 95% confidence interval; RR<sub>U</sub>, RR of the associations between air temperature, a potential unmeasured confounder, and all-cause and respiratory mortality.

<sup>1</sup> Song, X., Wang, S., Hu, Y., Yue, M., Zhang, T., Liu, Y., Tian, J., Shang, K., 2017. Impact of ambient temperature on morbidity and mortality: An overview of reviews. *Sci. Total Environ.* 586, 241–254. <https://doi.org/10.1016/j.scitotenv.2017.01.212>



**Appendix A**  
**Supplementary data 1**

**Figure A.2. Funnel plots to explore publication bias.**

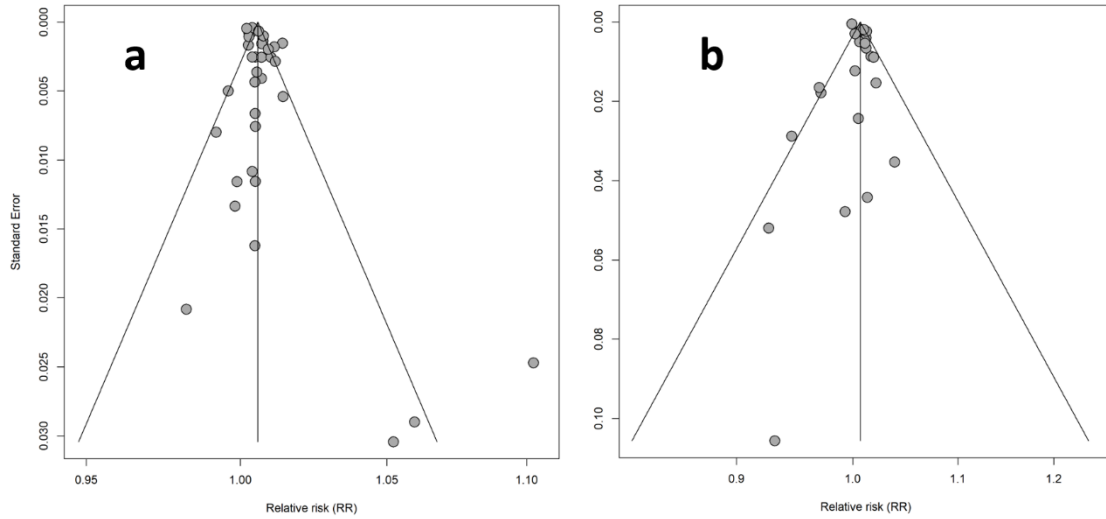

a) SO<sub>2</sub> (24-hour average) – All-cause mortality; b) SO<sub>2</sub> (24-hour average) – Respiratory mortality

**Appendix A**  
**Supplementary data 1**

**Table A.10. Co-pollutant analysis.**

| Pollutant                         | Outcome               | Number of effect sizes | Single pollutant model           | Co-pollutant model               | Adjusted by     |
|-----------------------------------|-----------------------|------------------------|----------------------------------|----------------------------------|-----------------|
|                                   |                       |                        | RR<br>(95% CI)                   | RR<br>(95% CI)                   |                 |
| SO <sub>2</sub> (24-hour average) | All-cause mortality   | 8                      | <b>1.0053</b><br>(1.0031-1.0076) | <b>1.0038</b><br>(1.0021-1.0054) | PM              |
| SO <sub>2</sub> (24-hour average) | All-cause mortality   | 3                      | 1.0043<br>(0.9971-1.0115)        | 1.0043<br>(0.9964-1.0123)        | O <sub>3</sub>  |
| SO <sub>2</sub> (24-hour average) | All-cause mortality   | 5                      | <b>1.0059</b><br>(1.0020-1.0099) | 1.0038<br>(0.9980-1.0095)        | NO <sub>2</sub> |
| SO <sub>2</sub> (24-hour average) | Respiratory mortality | 4                      | <b>1.0088</b><br>(1.0032-1.0146) | <b>1.0059</b><br>(1.0028-1.0090) | PM              |

RR, pooled relative risks; 95% CI, 95% confidence interval; p-value, significance of the association; statistically significant results in bold.
